# Supplementary material for: Nanoparticle-mediated tumor cell expression of mIL-12 via systemic gene delivery treats syngeneic models of murine lung cancers
Source: PubMed Central journal article supplement (PMC8102550; doi:10.1038/s41598-021-89124-4), 2021-05-06
Supplement: 41598_2021_89124_MOESM1_ESM.pdf [file 41598_2021_89124_MOESM1_ESM.pdf]

**Title**

**Nanoparticle-mediated tumor cell expression of mIL-12 *via* systemic gene delivery treats syngeneic models of murine lung cancers.**

**Authors**

H. Ahn<sup>1</sup>, C. Carrington<sup>2</sup>, Y. Hu<sup>4</sup>, H. Liu<sup>3,5</sup>, C. Ng<sup>3</sup>, H. Nam<sup>1,5</sup>, A. Park<sup>1, ‡</sup>, C. Stace<sup>2†</sup>, W. West<sup>2</sup>, H. Mao<sup>3,4,5</sup>, M. G. Pomper<sup>1,5</sup>, C. G. Ullman<sup>2,\*,††</sup>, I. Minn<sup>1,5,\*</sup>

**Affiliations**

<sup>1</sup>Russel H. Morgan Department of Radiology and Radiological Science, Division of Nuclear Medicine and Molecular Imaging, Johns Hopkins University, School of Medicine, Baltimore, MD 21205, USA

<sup>2</sup>Cancer Targeting Systems, 1188 Centre Street, Newton Centre, MA 02459, USA.

<sup>3</sup>Department of Materials Science and Engineering, Johns Hopkins University, Baltimore, MD 21218, USA

<sup>4</sup>Translational Tissue Engineering Center, Department of Biomedical Engineering, Johns Hopkins University, School of Medicine, Baltimore, MD 21287, USA

<sup>5</sup>Institute for NanoBioTechnology, Johns Hopkins University, Baltimore, MD 21218, USA

†Present address: Platform First, Clare Drive, Highfields Caldecote, Cambridge, United Kingdom, CB23 7GB.

‡Present address: AstraZeneca (MedImmune), One Medimmune Way, Gaithersburg, MD 20878

†† Present address: Paratopix Ltd., Bishop's Stortford, CM23 5JD, UK

\*Corresponding authors: [chris.ullman@paratopix.com](mailto:chris.ullman@paratopix.com); [iminn1@jhmi.edu](mailto:iminn1@jhmi.edu)

## Supplementary Material

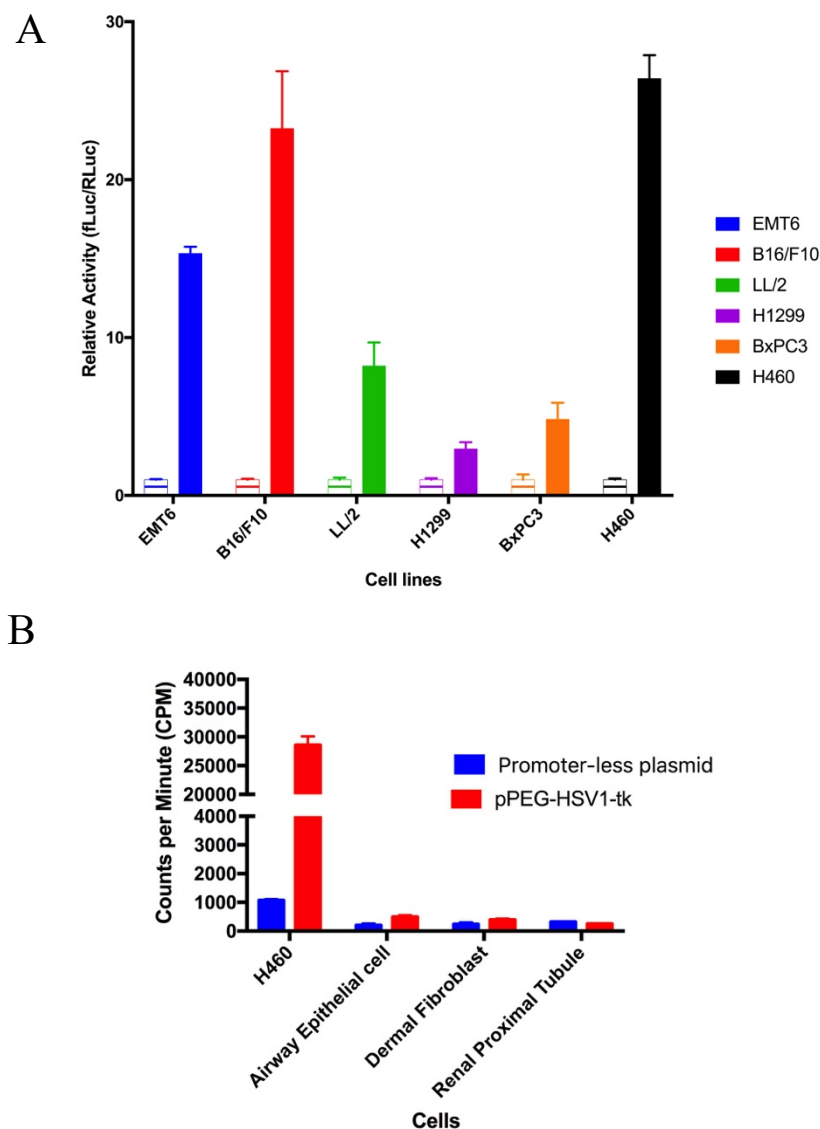

**Fig. S1: The relative activities of *PEG-3* promoter in human and murine cancer cell lines and human normal cells.** (A) Activity of the *PEG-3* promoter was assayed in EMT6 (murine mammary carcinoma), B16F10 (murine melanoma), LL/2 (murine Lewis lung carcinoma), H1299 (human lung carcinoma, non-small cell carcinoma), BxPC3 (human pancreas adenocarcinoma) and H460 (human large lung cell carcinoma) and compared to a plasmid control (promoter-less plasmid, dashed columns). Expression was normalized by comparing levels of firefly luciferase (fLuc) with Renilla luciferase (RLuc) expressed from a single plasmid vector for dual expression of reporters. (B) Activity of the *PEG-3* promoter was compared among human lung carcinoma cell line (H460) and human primary normal cells listed above. Each cell were transfected with pPEG-HSV1-tk plasmid or promoter-less control plasmid. The expression of HSV1-tk was assessed by measuring the uptake level of radioactive substrate of HSV1-tk, [<sup>125</sup>I]FIAU (1-(2-deoxy-2-fluoro-1-D-arabinofuranosyl)-5-iodouracil).

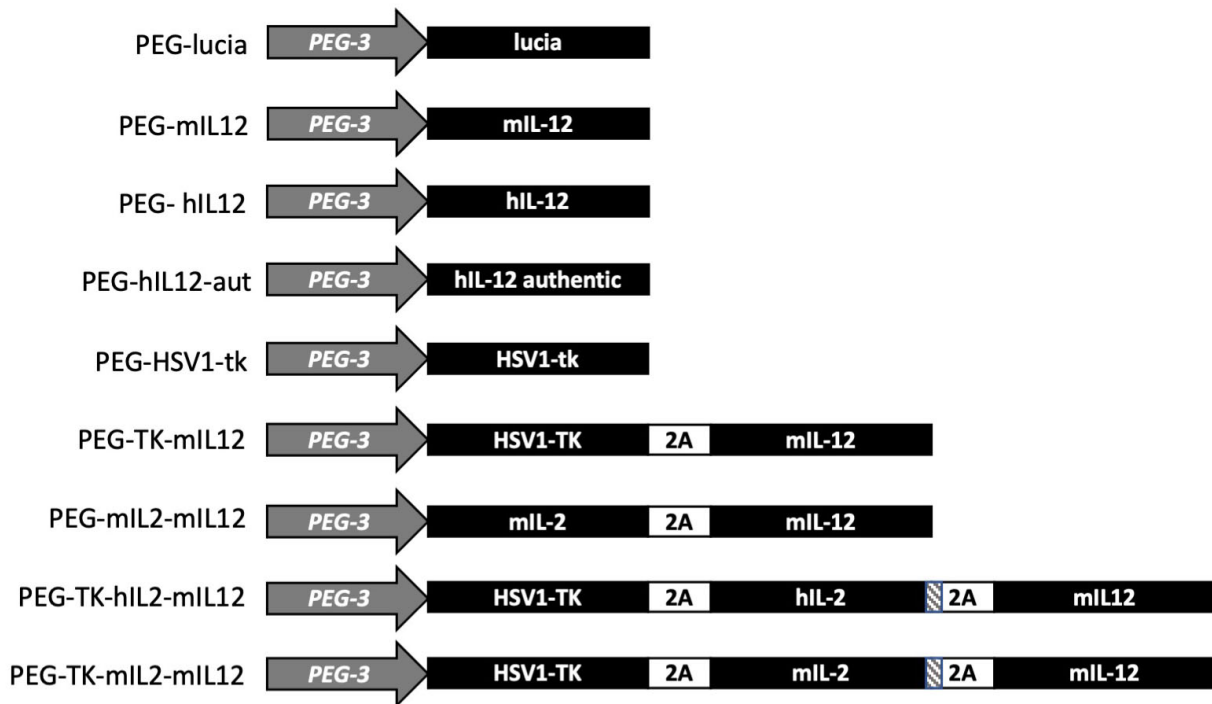

**Fig. S2: Diagram of the expression cassettes for the plasmids tested in this study.** Each expression cassette is driven by the *PEG-3* promoter, individual protein coding regions were separated by a picornavirus 2A sequence (2A) and additionally a furin cleavage site (hatched box). Each cassette was engineered to eliminate CpG sites except for hIL12-aut, which is authentic hIL-12 cDNA including CpG sequences. Size of plasmids: PEG-TK-mIL12, 6098 bp; and PEG-TK-hIL2-mIL12, 6632 bp; compared with PEG-mIL12, 4898 bp; PEG-HSV1-tk, 4393 bp; PEG-hIL12 and PEG-hIL12-aut, 4885 bp; and PEG-lucia, 3888 bp.

A

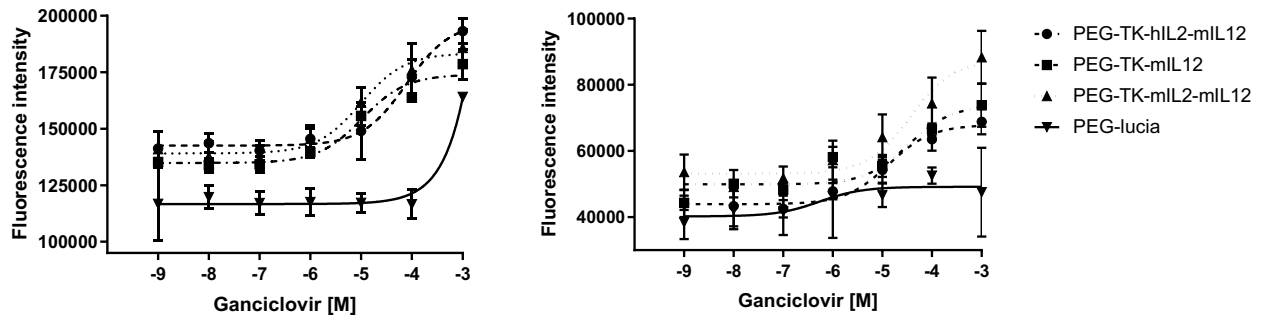

B

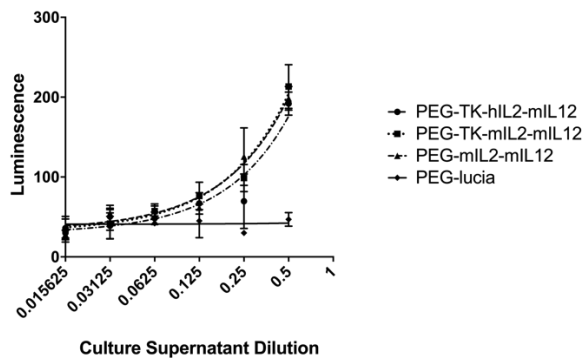

C

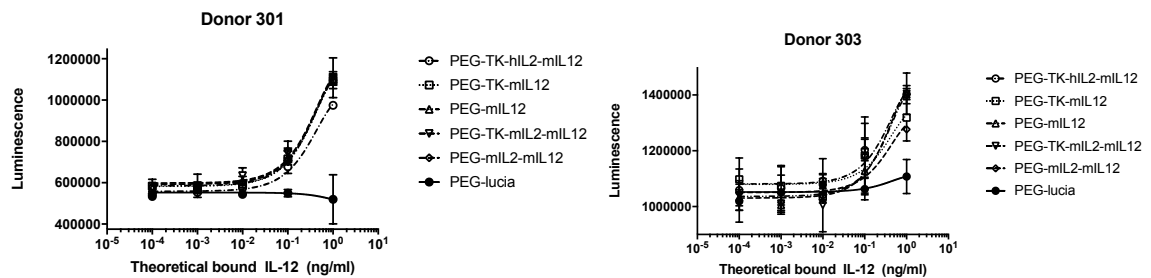

**Fig. S3: Functional activity of expressed genes *in vitro*.** Activity of the genes expressed from plasmids PEG-TK-hIL2-mIL12, PEG-TK-mIL12, PEG-TK-mIL2-mIL12 and PEG-lucia were evaluated in three different assays. (A) phosphorylation of ganciclovir by plasmid expressed HSV1-TK as assayed by cytotoxicity from two different experiments in triplicate (except PEG-TK-hIL2-mIL12 in the first graph, which was duplicate). (B) CTLL2 proliferation assay to show stimulation of murine CTLL2 T-cells by the expressed genes mIL-12 and h-IL2 (in triplicate for PEG-TK-hIL2-mIL12 and PEG-TK-mIL2-mIL12 but duplicate for PEG-mIL2-mIL12 and PEG lucia). (C) human PBMC proliferation assay following capture of murine IL-12 from cell culture (samples tested in duplicate). Least squares fitting was used to plot the curves.

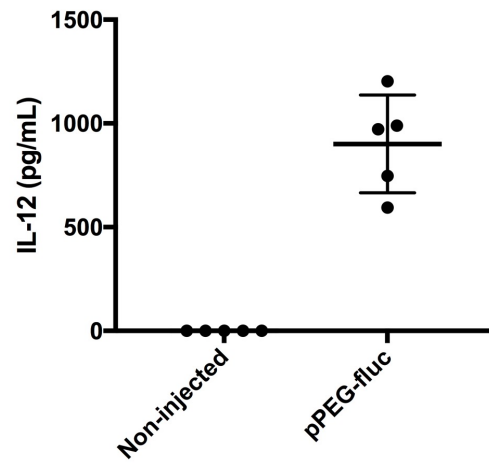

**Fig. S4: Induction of significant level of IL-12 via CpG-rich plasmid.** The research grade plasmid, pPEG-fluc containing 357 CpG sequences induced significantly high level of IL-12 in serum of CD-1 mice at 2 h post injection of the nanoparticle.

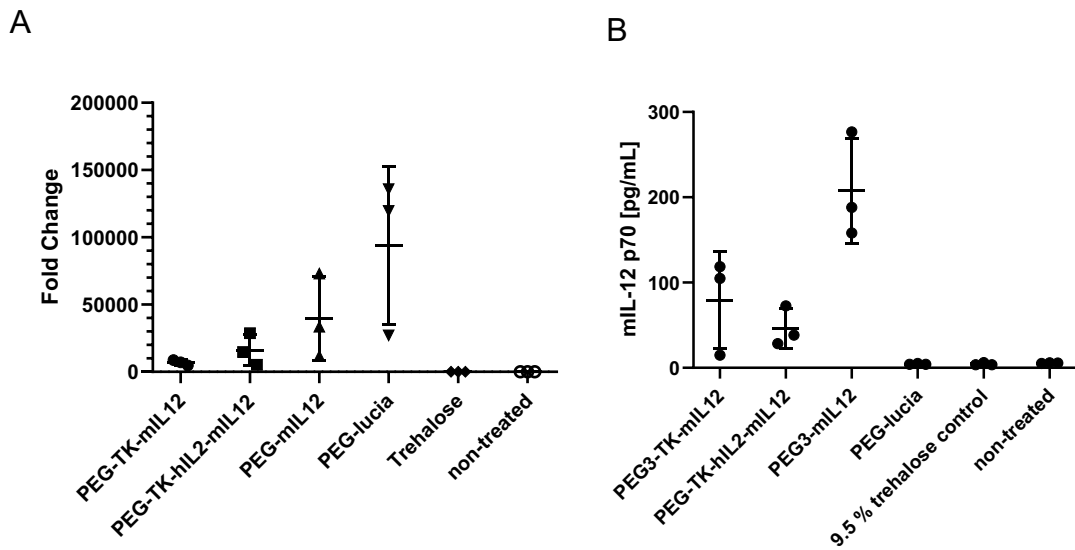

**Fig. S5: Quantitative PCR (qPCR) analysis and mIL-12 expression of the plasmid delivery in the lungs of LL/2 bearing mice.** (A). qPCR probes were designed to amplify a region of the *PEG-3* promoter to monitor distribution of the plasmid 9 d after tumor cell inoculation and one day following the second treatment with nanoparticles. For this cohort of mice, treatment schedule was 5 and 8 d after tumor cell inoculation rather than 5 and 9 d. (B). expression of mIL-12 in the lungs (following resection of major tumours) as monitored by ELISA. Statistical significance was not calculated for these results due to the limited number of animals (n = 3).

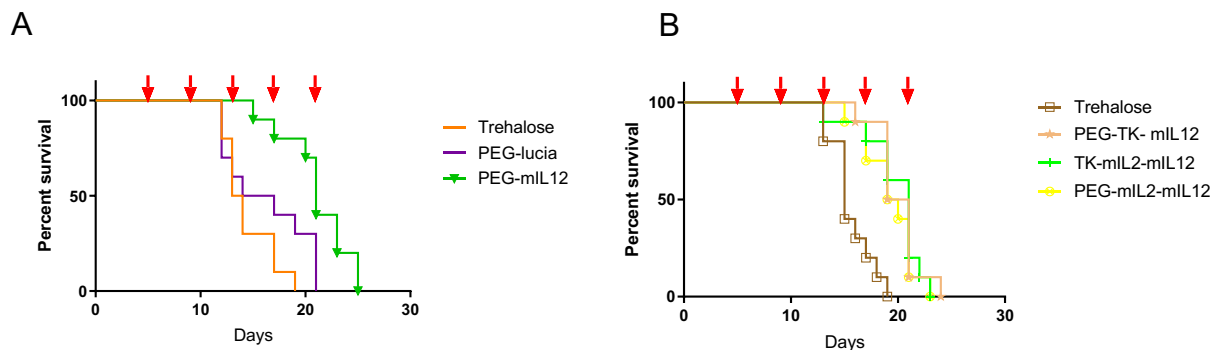

**Fig. S6: Activity of l-PEI/DNA nanoparticles in a second study in an LL/2 syngeneic, orthotopic model of primary lung cancer in C57BL/6 mice represented by a Kaplan Meier survival plot.** Mice were inoculated orthotopically inoculated with LL/2 Red-FLuc murine lung cancer cell line and treated with nanoparticles at 4-d intervals, beginning on Day 5, as indicated by the arrows above the chart. PEG-mIL12 nanoparticles significantly ( $p \leq 0.05$ , Log-rank) extended survival in this model compared to the vehicle control (trehalose control) and PEG-lucia control (A). PEG-TK-mIL12, PEG-TK-mIL2-mIL12 and PEG-mIL2-mIL12 significantly ( $p \leq 0.05$ , Log-rank test) extended survival in this model compared to the vehicle control (9.5% trehalose) (B).

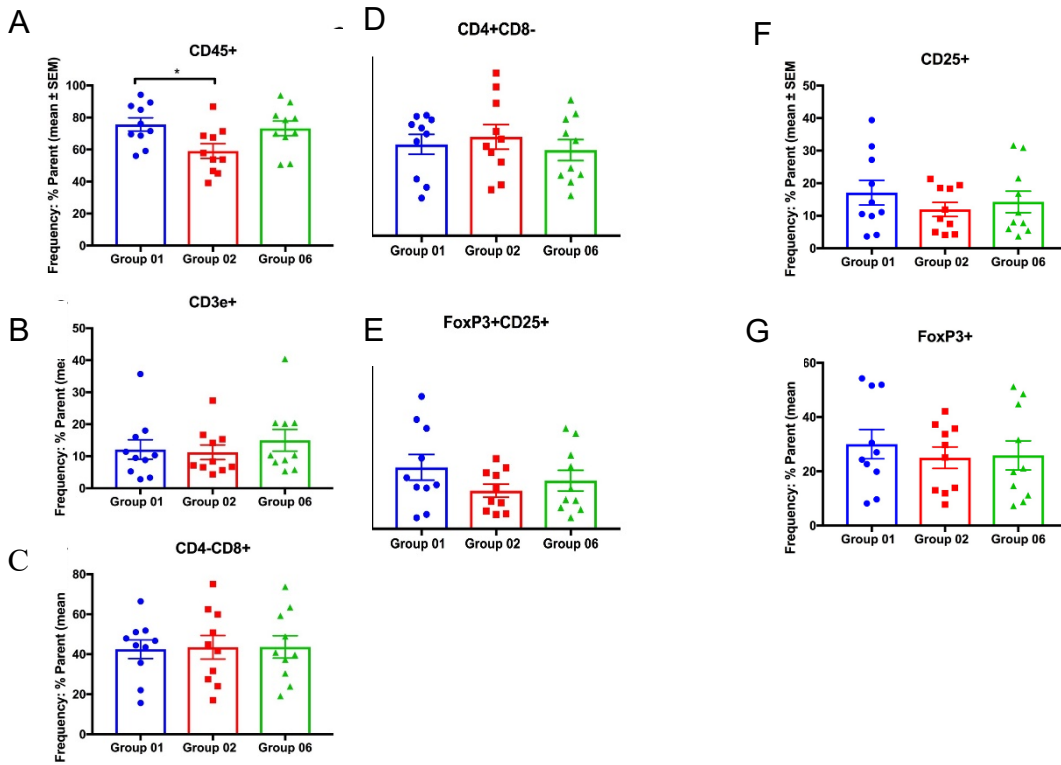

**Fig. S7: FACS analyses of the cell populations within the LL/2 tumours in mice at the time of termination.** Group 1 animals were the vehicle control (treated with 9.5% trehalose); Group 2 animals were treated with PEG-mIL12; Group 6 animals were in the nanoparticle control group (PEG-luciferase). CD45<sup>+</sup> lymphocytes were significantly lower in the mice treated with PEG-mIL12 compared to the vehicle control (A). However, there were no significant differences in the populations of CD3e<sup>+</sup> (B), CD4-CD8<sup>+</sup> (C), CD4+CD8<sup>-</sup> (D), FoxP3+CD25<sup>+</sup> (E), CD25<sup>+</sup> (F), FoxP3<sup>+</sup> expression levels (G) although the population of T<sub>reg</sub> cells (E, FoxP3+CD25<sup>+</sup>) in PEG-mIL12 (Group 2) was less than the controls.



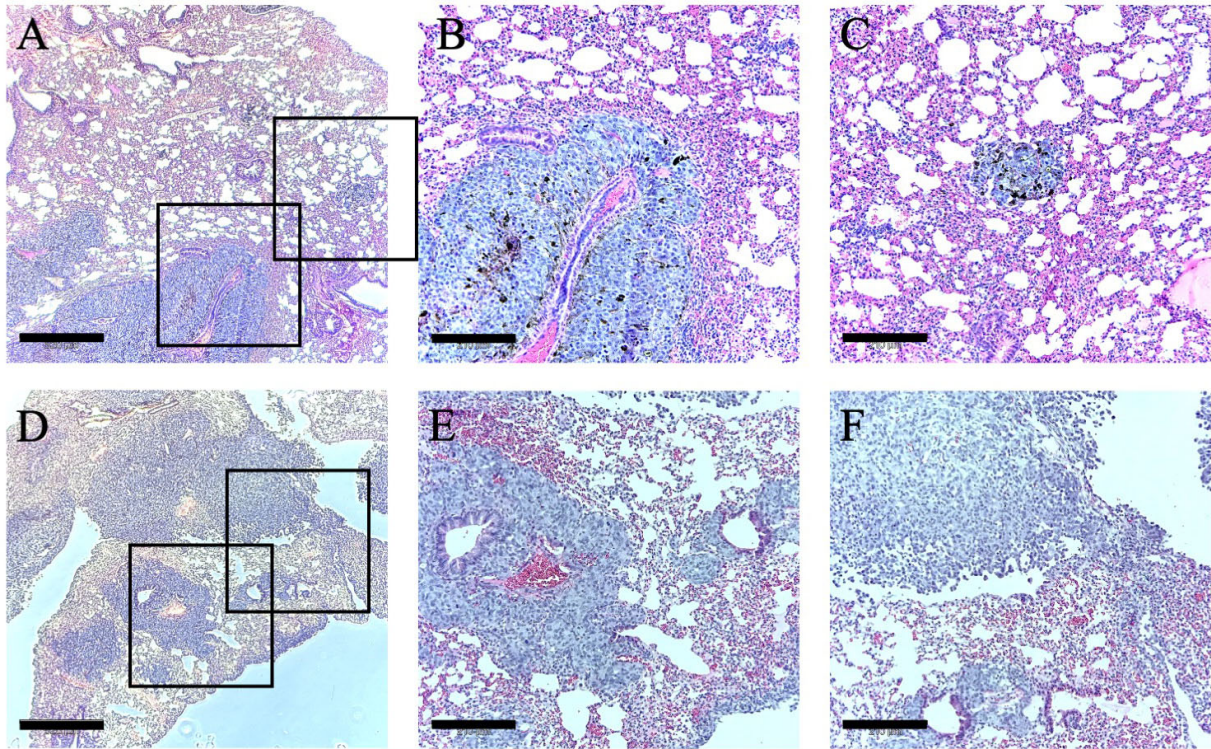

**Fig. S8: Histological confirmation of the lung tumor models.** (A-C) LL/2-Red-Fluc cells orthotopically injected in a lung of C57BL/6 mice. (D-F) B16F10-Red-FLuc cells intravenously injected in a lung of C57BL/6 mice. H&E stained slides were microscopically captured with 4x objective (A and D, scale bar: 520  $\mu\text{m}$ ) and 10x objective (B, C, E, and F) scale bar: 210  $\mu\text{m}$ ). Squares in A and D present the enlarged images.

**Table S1: Expression of IL-12 and IL-2 in LL/2 Red-Fluc Cells in Culture**

| <b>PEG Plasmid construct</b> | <b>Mean mIL-2 yield (pg/mL, n = 2)</b> | <b>Mean mIL-2 yield ng/10<sup>6</sup> (48 h, n = 2)</b> |
|------------------------------|----------------------------------------|---------------------------------------------------------|
| <b>PEG-mIL2-mIL12</b>        | 1107.0 ± 222.0                         | 11.1 ± 2.2                                              |
| <b>PEG-TK-mIL2-mIL12</b>     | 1556.0 ± 271.0                         | 15.6 ± 2.7                                              |
| <b>PEG-lucia</b>             | 135.0 ± 81.0                           | 1.3 ± 0.8                                               |

The data presented were the expression level of mIL-2 in the cell culture media measured by ELISA.

| <b>PEG Plasmid construct</b> | <b>Mean mIL-12 yield (pg/ml, n = 2)</b> | <b>Mean mIL-12 yield ng/10<sup>6</sup>/48 h (n = 2)</b> |
|------------------------------|-----------------------------------------|---------------------------------------------------------|
| <b>PEG -mIL12</b>            | 10896.0 ± 43.1                          | 109.0 ± 0.4                                             |
| <b>PEG-TK-mIL2</b>           | 16465.2 ± 160.0                         | 164.7 ± 1.6                                             |
| <b>PEG-mIL2-mIL12</b>        | 8460.0 ± 1380.0                         | 84.5 ± 13.8                                             |
| <b>PEG-TK-hIL2-mIL12</b>     | 15819.1 ± 596.9                         | 158.2 ± 6.0                                             |
| <b>PEG-TK-mIL2-mIL12</b>     | 10060.0 ± 2910.0                        | 100.6 ± 29.1                                            |
| <b>PEG-lucia</b>             | Non detected                            | Non detected                                            |

The data presented were the expression level of mIL-12 in the cell culture media measured by ELISA.

**Table S2: Blood markers for liver toxicity, amongst other indicators, compared to control mice**

| Group | Animal ID | ALP (U/L) | AST (U/L) | ALT (U/L) | Creatine kinase (U/L) | Albumin (g/dL) | Total Bilirubin (mg/dL) | Total Protein (g/dL) | Globulin (g/dL) |
|-------|-----------|-----------|-----------|-----------|-----------------------|----------------|-------------------------|----------------------|-----------------|
| 1     | 1450340   | 61        | 219       | 102       | 301                   | 2.5            | 0.2                     | 4.4                  | 1.9             |
|       | 1454350   | 68        | 121       | 52        | 89                    | 2.4            | 0.1                     | 4.1                  | 1.7             |
|       | 1481194   | 76        | 161       | 66        | 78                    | 2.3            | 0.2                     | 4.0                  | 1.7             |
| 2     | 1442078   | 68        | 141       | 71        | 71                    | 2.3            | 0.2                     | 3.9                  | 1.6             |
|       | 1458383   | 63        | 194       | 60        | 209                   | 2.3            | 0.2                     | 4.0                  | 1.7             |
|       | 1481946   | 68        | 140       | 61        | 87                    | 2.5            | 0.2                     | 4.3                  | 1.8             |
| 3     | 1456800   | 50        | 135       | 52        | 234                   | 2.3            | 0.2                     | 4.1                  | 1.8             |
|       | 1464378   | 72        | 237       | 104       | 278                   | 2.3            | 0.2                     | 4.0                  | 1.7             |
|       | 1515026   | 59        | 234       | 111       | 137                   | 2.1            | 0.2                     | 3.8                  | 1.7             |
| 4     | 1453174   | 58        | 115       | 50        | 70                    | 2.3            | 0.1                     | 4.1                  | 1.8             |
|       | 1465142   | 50        | 155       | 43        | 209                   | 2.4            | 0.2                     | 4.2                  | 1.8             |
|       | 1542998   | 45        | 147       | 63        | 167                   | 2.5            | 0.2                     | 4.2                  | 1.7             |
| 5     | 1457923   | 98        | 109       | 36        | 182                   | 3.0            | 0.2                     | 4.7                  | 1.7             |
|       | 1493364   | 65        | 80        | 38        | 91                    | 2.9            | 0.2                     | 4.6                  | 1.7             |
|       | 1495315   | 102       | 90        | 32        | 177                   | 2.9            | 0.2                     | 4.6                  | 1.7             |
| 6     | 1433640   | 81        | 79        | 32        | 106                   | 3.1            | 0.2                     | 5.0                  | 1.9             |
|       | 1449564   | 84        | 126       | 37        | 1371                  | 2.9            | 0.2                     | 4.7                  | 1.8             |
|       | 1458371   | 83        | 75        | 29        | 119                   | 3.0            | 0.1                     | 4.7                  | 1.7             |

ALP: alkaline phosphatase; AST: aspartate amino transferase; ALT: alanine amino transferase

| Group | Animal ID | Bilirubin - Conjugated (mg/dL) | BUN (mg/dL) | Creatinine (mg/dL) | Cholesterol (mg/dL) | Glucose (mg/dL) | Calcium (mg/dL) | Phosphorus (mg/dL) | Bicarbonate TCO <sub>2</sub> (mmol/L) |
|-------|-----------|--------------------------------|-------------|--------------------|---------------------|-----------------|-----------------|--------------------|---------------------------------------|
| 1     | 1450340   | 0.0                            | 20          | 0.0                | 93                  | 184             | 9.3             | 6.2                | 26                                    |
|       | 1454350   | 0.0                            | 18          | 0.1                | 92                  | 190             | 9.2             | 6.5                | 25                                    |
|       | 1481194   | 0.0                            | 18          | 0.1                | 90                  | 237             | 9.2             | 7.0                | 18                                    |
| 2     | 1442078   | 0.0                            | 18          | 0.1                | 82                  | 240             | 9.2             | 8.7                | 27                                    |
|       | 1458383   | 0.0                            | 21          | 0.1                | 91                  | 225             | 9.2             | 7.8                | 28                                    |
|       | 1481946   | 0.0                            | 19          | 0.1                | 90                  | 220             | 9.1             | 7.0                | 20                                    |
| 3     | 1456800   | 0.0                            | 11          | 0.1                | 87                  | 234             | 8.9             | 6.8                | 23                                    |
|       | 1464378   | 0.0                            | 15          | 0.1                | 85                  | 215             | 9.0             | 6.7                | 27                                    |
|       | 1515026   | 0.0                            | 14          | 0.1                | 90                  | 233             | 9.1             | 7.8                | 23                                    |
| 4     | 1453174   | 0.0                            | 13          | 0.1                | 100                 | 232             | 9.1             | 5.9                | 28                                    |
|       | 1465142   | 0.0                            | 14          | 0.0                | 96                  | 216             | 8.8             | 6.8                | 24                                    |
|       | 1542998   | 0.1                            | 13          | 0.1                | 90                  | 244             | 9.4             | 6.4                | 27                                    |
| 5     | 1457923   | 0.0                            | 19          | 0.1                | 87                  | 283             | 9.3             | 6.4                | 27                                    |
|       | 1493364   | 0.0                            | 12          | 0.1                | 93                  | 272             | 8.8             | 6.2                | 26                                    |
|       | 1495315   | 0.0                            | 14          | 0.1                | 87                  | 330             | 9.4             | 7.8                | 19                                    |
| 6     | 1433640   | 0.0                            | 22          | 0.1                | 70                  | 322             | 9.4             | 6.3                | 28                                    |
|       | 1449564   | 0.0                            | 24          | 0.0                | 75                  | 323             | 9.6             | 8.4                | 17                                    |
|       | 1458371   | 0.0                            | 21          | 0.1                | 73                  | 387             | 9.4             | 8.8                | 21                                    |

BUN: Blood Urea Nitrogen

| Group | Animal ID | Chloride (mmol/L) | Potassium (mmol/L) | ALB/GLOB ratio | Sodium (mmol/L) | BUN/Creatinine Ratio | Bilirubin - Unconjugated (mg/dL) | Na/K Ratio | Haemolysis Index | Lipaemia Index |
|-------|-----------|-------------------|--------------------|----------------|-----------------|----------------------|----------------------------------|------------|------------------|----------------|
| 1     | 1450340   | 109               | 5.1                | 1.3            | 144             | 0.0                  | 0.2                              | 28         | +                | Normal         |
|       | 1454350   | 114               | 5.0                | 1.4            | 145             | 180.0                | 0.1                              | 29         | Normal           | Normal         |
|       | 1481194   | 115               | 3.6                | 1.4            | 146             | 180.0                | 0.2                              | 41         | +                | Normal         |
| 2     | 1442078   | 116               | 3.9                | 1.4            | 147             | 180.0                | 0.2                              | 38         | +                | Normal         |
|       | 1458383   | 117               | 4.3                | 1.4            | 148             | 210.0                | 0.2                              | 34         | +                | Normal         |
|       | 1481946   | 113               | 4.2                | 1.4            | 146             | 190.0                | 0.2                              | 35         | +                | Normal         |
| 3     | 1456800   | 110               | 5.1                | 1.3            | 144             | 110.0                | 0.2                              | 28         | +                | Normal         |
|       | 1464378   | 115               | 4.6                | 1.4            | 145             | 150.0                | 0.2                              | 32         | +                | Normal         |
|       | 1515026   | 116               | 3.7                | 1.2            | 146             | 140.0                | 0.2                              | 39         | +                | Normal         |
| 4     | 1453174   | 112               | 5.4                | 1.3            | 143             | 130.0                | 0.1                              | 26         | Normal           | Normal         |
|       | 1465142   | 106               | 6.0                | 1.3            | 141             | 0.0                  | 0.2                              | 24         | ++               | Normal         |
|       | 1542998   | 111               | 4.3                | 1.5            | 144             | 130.0                | 0.1                              | 33         | Normal           | Normal         |
| 5     | 1457923   | 108               | 4.3                | 1.8            | 143             | 190.0                | 0.2                              | 33         | +                | Normal         |
|       | 1493364   | 111               | 4.4                | 1.7            | 142             | 120.0                | 0.2                              | 32         | +                | Normal         |
|       | 1495315   | 108               | 3.2                | 1.7            | 143             | 140.0                | 0.2                              | 45         | +                | Normal         |
| 6     | 1433640   | 111               | 4.2                | 1.6            | 144             | 220.0                | 0.2                              | 34         | +                | Normal         |
|       | 1449564   | no result         | no result          | 1.6            | no result       | 0.0                  | 0.2                              | no result  | +                | Normal         |
|       | 1458371   | 109               | 3.3                | 1.8            | 144             | 210.0                | 0.1                              | 44         | +                | Normal         |

ALB/GLOB: Albumin/Globulin ratio; BUN: Blood Urea Nitrogen; Na/K: Sodium/Potassium ratio  
+ slightly; ++ moderately; +++ high; No result: Insufficient sample

Group 1, mice treated with PEG-TK-mIL12 nanoparticles; Group 2, mice treated with PEG-TK-hIL2-mIL12 nanoparticles; Group 3, mice treated with PEG-mIL12 nanoparticles; Group 4, mice treated with PEG-lucia nanoparticles; Group 5, Trehalose treated mice; Group 6, untreated mice.

**Table S3: Details of necropsy for individual mice treated in the B16F10 experimental**

| Group and Treatment                  | Animal ID | Necropsy Findings                                                                                                                                                                                                        |
|--------------------------------------|-----------|--------------------------------------------------------------------------------------------------------------------------------------------------------------------------------------------------------------------------|
| Group 1<br>9.5% Trehalose<br>Control | 3475345 * | -                                                                                                                                                                                                                        |
|                                      | 3481051   | Multiple metastases in thoracic cavity ranging from ~3-8mm, large 1-13mm metastasis under liver and behind neck subcutaneously                                                                                           |
|                                      | 3489133   | Metastases around ovary and dispersed in abdominal wall                                                                                                                                                                  |
|                                      | 3505397 * | -                                                                                                                                                                                                                        |
|                                      | 3507249 * | -                                                                                                                                                                                                                        |
|                                      | 3507597   | Metastases on liver and on snout                                                                                                                                                                                         |
|                                      | 3525474   | No abnormal findings                                                                                                                                                                                                     |
|                                      | 3558142   | Metastases around ovary and dispersed through abdomen                                                                                                                                                                    |
|                                      | 3565875   | No abnormal findings                                                                                                                                                                                                     |
|                                      | 3588161   | Stomach and bowels appear necrotic (black, no visible metastases). Tumour growth within urethra visible and bladder is very full. Metastases also visible in thoracic cavity (adhered to rib cage and connective tissue) |
| Group 2<br>PEG-Lucia                 | 3451312   | Metastases in thoracic cavity and diaphragm ~3-6mm, intestinal metastasis ~8-11mm, metastasis under L kidney ~4-6mm                                                                                                      |
|                                      | 3470281   | No abnormal findings                                                                                                                                                                                                     |
|                                      | 3490590   | No abnormal findings                                                                                                                                                                                                     |
|                                      | 3497422 * | Large ovarian metastasis                                                                                                                                                                                                 |
|                                      | 3499019   | Several abdominal metastases, large upper abdominal metastasis and intestinal metastasis                                                                                                                                 |
|                                      | 3501434   | Small metastases < 3mm & ~3-5mm metastases in thoracic cavity, multiple metastases along intestinal tract ranging ~3mm-13mm                                                                                              |
|                                      | 3510444 * | -                                                                                                                                                                                                                        |
|                                      | 3516248   | Metastases on neck and snout.                                                                                                                                                                                            |
|                                      | 3573116   | Small metastases in thoracic cavity and a small metastasis along intestinal tract                                                                                                                                        |
|                                      | 3585713   | Small metastases in thoracic cavity, 4-6mm metastasis along intestinal tract                                                                                                                                             |
| Group 3<br>mIL12                     | 3451376   | Metastases on liver and snout.                                                                                                                                                                                           |
|                                      | 3456547   | Metastases in small intestine and neck (lymph node) and rib cage. Inflated small intestine, stomach appears normal                                                                                                       |
|                                      | 3475682   | Large amorphous mass with the same form as metastases completely intertwined with small intestine and filled entire abdominal cavity                                                                                     |
|                                      | 3481779 * | Animal found dead, necropsy was performed but no samples collected due to autolysing of tissues. one large tumour on upper left flank in subcutaneous space. One large metastasis on lung filled half of a lobe.         |
|                                      | 3491364   | Metastasis in place of left ovary. Inflated gastrointestinal tract. Metastasis on spleen.                                                                                                                                |
|                                      | 3498357   | Very large submandibular gland right side, metastasis on lower right flank in muscle                                                                                                                                     |
|                                      | 3499982 * | -                                                                                                                                                                                                                        |
|                                      | 3509328   | Metastasis in place of right ovary. Metastases in pelvic fat, mesentery of small intestine, spleen, liver, rib cage and neck                                                                                             |
|                                      | 3562662   | black (possibly faeces) in portion of gastrointestinal tract, small mass on right kidney, large right submandibular mass                                                                                                 |
|                                      | 3586399 * | -                                                                                                                                                                                                                        |

\*Animal was found dead. Necropsy not performed unless within 2 hours of death.

Table S3 (continued)

| Group and Treatment          | Animal ID | Necropsy Findings                                                                                                                                                                                                                                                                                                          |
|------------------------------|-----------|----------------------------------------------------------------------------------------------------------------------------------------------------------------------------------------------------------------------------------------------------------------------------------------------------------------------------|
| Group 4<br>TK-mIL12          | 3470333   | No visible metastases elsewhere on body apart from lungs                                                                                                                                                                                                                                                                   |
|                              | 3479930 * | No visible metastases elsewhere on body apart from lungs                                                                                                                                                                                                                                                                   |
|                              | 3481877   | Very small spleen and intestines/stomach appear empty. Metastasis on left mandible.                                                                                                                                                                                                                                        |
|                              | 3482693   | Large gelatinous pieces of tumour were present in thoracic cavity (not connected to lung).<br>Not included in weight of lung.                                                                                                                                                                                              |
|                              | 3490425 * | Small ovary metastasis on right side, large metastasis attached to pelvic fat                                                                                                                                                                                                                                              |
|                              | 3500035   | Large metastasis in pelvic fat                                                                                                                                                                                                                                                                                             |
|                              | 3504626 * | Small metastasis on left ovary                                                                                                                                                                                                                                                                                             |
|                              | 3506583   | Ovarian metastasis. Metastases in small intestine and colon. Vaginal metastasis.<br>Metastases surrounding kidney.                                                                                                                                                                                                         |
|                              | 3507404   | Metastasis in place of each ovary. Metastasis on heart and liver                                                                                                                                                                                                                                                           |
| Group 5<br>mIL2-mIL1         | 3523562   | No abnormal findings                                                                                                                                                                                                                                                                                                       |
|                              | 3470141   | Metastases in snout, coming out of mouth. Gastrointestinal tract including stomach<br>inflated with air                                                                                                                                                                                                                    |
|                              | 3475123   | Metastases found in left hind limb, right fore-limb, left nostril, spleen, and spine in<br>thoracic cavity. Air-filled intestinal tract, light pink liver.                                                                                                                                                                 |
|                              | 3475639   | Large right ovary, medium mesenteric lymph node tumour, discoloured greyish liver                                                                                                                                                                                                                                          |
|                              | 3481721   | Metastases around oesophagus and in thoracic cavity. Metastases in pelvic fat and three<br>lobes in pelvic fat. Metastases in place of each ovary. Metastasis on left kidney.<br>Metastasis on middle left flank within subcutaneous space.                                                                                |
|                              | 3493587 * | -                                                                                                                                                                                                                                                                                                                          |
|                              | 3496210   | Metastases on upper right flank in subcutaneous space, right ovary, 2 in pelvic fat, all very<br>large. Small metastasis on right kidney, black necrotic intestines, discoloured greyish liver                                                                                                                             |
|                              | 3496565   | Metastasis on ventral portion of neck. Metastasis in place of left ovary.                                                                                                                                                                                                                                                  |
|                              | 3497851 * | One large ovarian metastasis, digestive tract was mildly inflated                                                                                                                                                                                                                                                          |
|                              | 3500081   | Metastases present on small intestine                                                                                                                                                                                                                                                                                      |
|                              | 3511772   | Metastases filling thoracic cavity. Large tumour found in pelvis, metastasis on right<br>kidney                                                                                                                                                                                                                            |
| Group 6<br>TK-mIL2-<br>mIL12 | 3473669   | Several abdominal metastases saved                                                                                                                                                                                                                                                                                         |
|                              | 3475099   | Large red tumour on left mandible. Metastases in pelvic fat                                                                                                                                                                                                                                                                |
|                              | 3477074   | No visible metastases elsewhere on body apart from lungs                                                                                                                                                                                                                                                                   |
|                              | 3477866   | ~20 metastases within mesentery of small intestine. Metastases in pelvic fat mass.<br>Metastasis in axial portion of right fore-limb. Very large metastasis in place of right<br>ovary. Multiple metastases within each lobe of the liver. Very large red/black mass<br>surrounding left kidney.                           |
|                              | 3484561   | Large abdominal tumour, possibly connected to liver, mesenteric ln tumour, large tumour<br>possibly connected to pelvic fat or urethra                                                                                                                                                                                     |
|                              | 3485162   | Metastases on each ovary. Large metastasis on rib cage.                                                                                                                                                                                                                                                                    |
|                              | 3492330   | Metastases in place of kidney. Metastasis on liver.                                                                                                                                                                                                                                                                        |
|                              | 3493833   | Metastases in pelvic fat and filling thoracic cavity. Vaginal tumour present.                                                                                                                                                                                                                                              |
|                              | 3497256   | Very large subcutaneous metastasis on the lower ventral abdomen just above the bladder.<br>Large metastases in place of left ovary. Large metastases in thoracic cavity just above<br>diaphragm connected to the dorsal rib cage-was not attached to lung, thus not included in<br>lung weight. One liver metastases ~3mm. |
|                              | 3510151   | Tumour in place of left ovary with many smaller lobes connected. Large metastases of<br>hilum of right kidney.                                                                                                                                                                                                             |

\*Animal was found dead. Necropsy not performed unless within 2 hours of death.
